# Supplementary material for: DELWAVE 1.0: deep learning surrogate model of surface wave climate in the Adriatic Basin
Source: Copernicus journal article supplement (doi:10.5194/gmd-17-4705-2024), 2024-06-17
Supplement: Supplementary file 1 [file gmd-17-4705-2024-supplement.pdf]

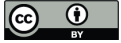

*Supplement of*

## **DELWAVE 1.0: deep learning surrogate model of surface wave climate in the Adriatic Basin**

**Peter Mlakar et al.**

*Correspondence to:* Peter Mlakar ([peter.mlakar@gov.si](mailto:peter.mlakar@gov.si)) and Matjaž Ličer ([matjaz.licer@gov.si](mailto:matjaz.licer@gov.si))

The copyright of individual parts of the supplement might differ from the article licence.

## S 1 Results

### S 1.1 Deep Network vs SWAN under far future climate 2071-2100

In this section we present supplementary material on DELWAVE performance during the far future period of 2071-2100, as benchmarked against SWAN simulations. Figure S 2 depicts DELWAVE-SWAN heatmaps of  $H_S$ ,  $d$  and  $T_{m-1,0}$  at the locations of OB2, OB3 and GD, see Figure S 1 for locations.

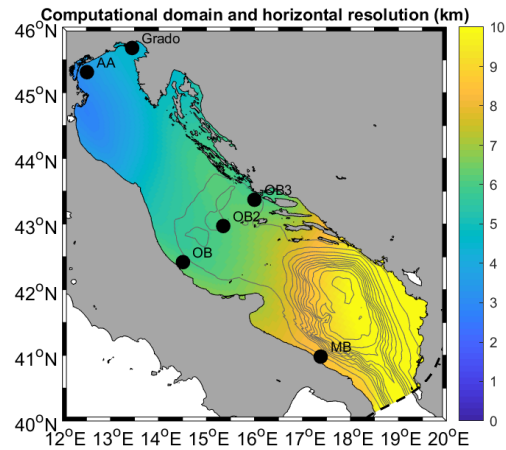

**Figure S 1.** Geographical domain, validation stations and locations considered in SWAN and DELWAVE modeling.

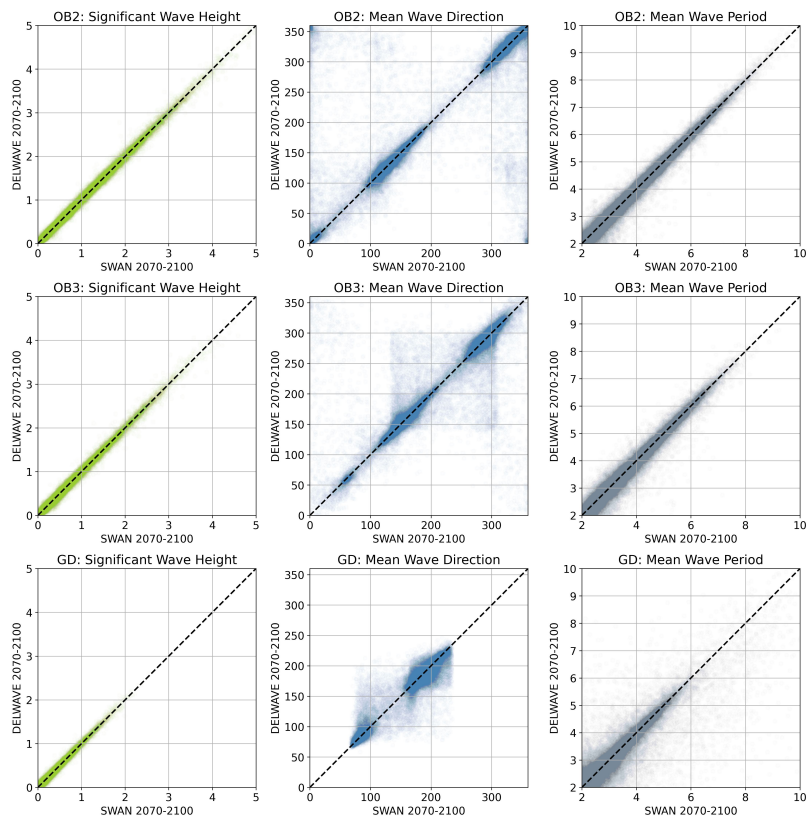

**Figure S 2.** DELWAVE forecasts vs SWAN targets for locations OB2 (top row), OB3 (middle row) and GD (bottom row). Mean wave directions are listed in nautical notation ( $0^\circ$  = North,  $90^\circ$  = East, etc.). Dashed diagonal line indicates a perfect forecast.
